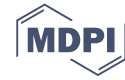

Article

# Survival of self-replicating molecules under transient compartmentalization with natural selection

Gabin Laurent<sup>1</sup>, Luca Peliti<sup>2</sup>  and David Lacoste<sup>3,\*</sup> 

<sup>1</sup> UMR CNRS Gulliver 7083, ESPCI, 10 rue Vauquelin, 75231 Paris Cedex 05 (France); gabin.laurent@u-psud.fr

<sup>2</sup> Santa Marinella Research Institute, 00052 Santa Marinella (Italy); luca@peliti.org

<sup>3</sup> UMR CNRS Gulliver 7083, ESPCI, 10 rue Vauquelin, 75231 Paris Cedex 05 (France); david.lacoste@espci.fr

\* Correspondence: david.lacoste@espci.fr

Version August 30, 2019 submitted to Life

**Abstract:** The problem of the emergence and survival of self-replicating molecules in origin-of-life scenarios is plagued by the error catastrophe, which is usually escaped by considering effects of compartmentalization, as in the stochastic corrector model. By addressing the problem in a simple system composed of a self-replicating molecule (a replicase) and a parasite molecule that needs the replicase for copying itself, we show that transient (rather than permanent) compartmentalization is sufficient to the task. We also exhibit a regime in which the concentrations of the two kinds of molecules undergo sustained oscillations. Our model should be relevant not only for origin-of-life scenarios but also for describing directed evolution experiments, which increasingly rely on transient compartmentalization with pooling and natural selection.

**Keywords:** origin of life; error catastrophe; parasites.

## 1. Introduction

Research on the Origins of Life is plagued by several chicken-and-egg problems [1]. One central problem concerns the emergence of functional self-replicating molecules. To be a functional replicator, a molecule must be long enough to carry sufficient information, but if it is too long it cannot be replicated accurately, because shorter non-functional molecules called parasites may replicate faster and take over the system. This was experimentally observed many years ago by Spiegelman [2]. This observation was then rationalized using the notion of error threshold [3], which plays a key role in research on the Origins of Life [4].

Several theoretical solutions have been proposed to address this issue, among which the Stochastic Corrector model [5,6] is prominent. In this model, small groups of replicating molecules grow in compartments, to a fixed final size called the carrying capacity. Then, the compartments are divided and their contents are stochastically partitioned between the two daughter compartments. Thanks to the variability introduced by this stochastic division, and to the selection acting on the compartments, functional replicators can be maintained in the presence of parasites.

Building on this work and on a recent experiment inspired by it [7], we have recently explored alternative scenarios that are also able to maintain information in replicating systems [8,9]. We have proposed a transient compartmentalization dynamics with no cell division, which should be achievable when only prebiotic chemistry is available. In our framework, there are no specific requirements regarding the chemical composition or the topology of the compartment boundaries: transient compartmentalization can result from environment fluctuations due to day-night cycles [10], tides cycles [11] or cycles of confinement and release of chemicals from pores [12].

In this paper, we extend the framework of Ref. [9] to the case of transient compartmentalization of self-replicating molecules. The main new element in this extension is that the selective pressures

34 acting on this system are not externally imposed, as in our previous work, but stem from the system  
35 intrinsic dynamics acting as a form of natural selection. Therefore, the assumptions of this new model  
36 are agnostic about the environment and its interaction with the system, which is a desirable feature  
37 for scenarios on the Origins of Life. Besides, this extension may be also pertinent for certain *in vitro*  
38 evolution experiments [13]. Indeed, *in vitro* evolution experiments based on external selection are  
39 often more difficult and cumbersome to carry out than the ones based on natural evolution, which we  
40 consider here.

41 In one version of our model, we find oscillatory behavior in the population size of replicators.  
42 Although the compartment chemistry we consider has some similarities with hypercycles, which  
43 are known to undergo oscillatory behavior in the population size of replicators [14], in our case the  
44 oscillations we observe, would not exist in the absence of a transient dynamics of compartmentalization.  
45 Thus, our oscillations are more related to the ones reported in experiments using compartmentalized  
46 RNA replication systems [15], which also disappear in the absence of compartmentalization. In  
47 the Discussion section, we compare the predictions of our model to these experiments and to the  
48 theoretical model [16] developed to analyze them. While our framework is applicable to such  
49 experimental systems, it is important to appreciate that it has a wide generality. It could equally  
50 well describe many other forms of compartmentalized hypercycles or coupled autocatalytic sets,  
51 because the self-replicating molecules which we consider need not be RNA replicases.

## 52 2. Materials and Methods

53 Here, we introduce two models describing a transient compartmentalization process in which  
54 self-replicating molecules (the replicase) may coexist with non-self replicating ones (the parasites)  
55 which may be replicated by the first ones. These models are amenable to mathematical analysis. In  
56 the first subsection we describe a model of transient compartmentalization where the compartments  
57 are populated at each round with an inoculum which has a fixed average size as shown in Figure 1a.  
58 In the second subsection, the size of the inoculum is allowed to vary in time as a result of successive  
59 dilutions as shown in Figure 1b.

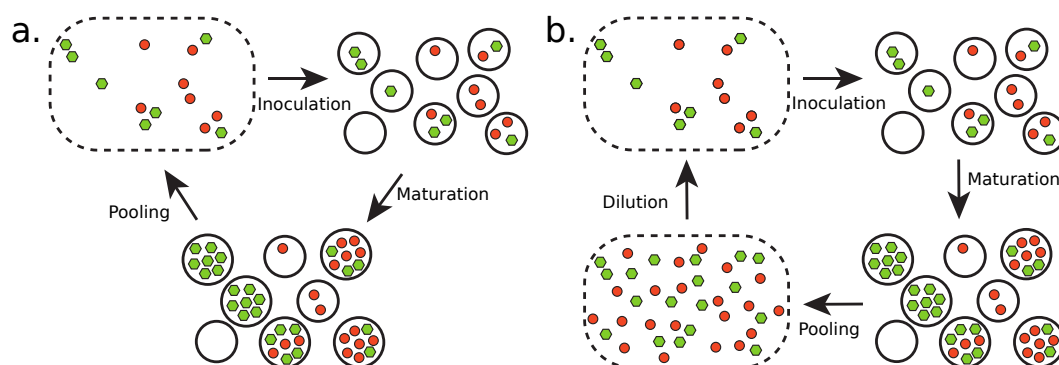

**Figure 1.** (a) Transient compartmentalization at fixed average number of molecules per compartment, and (b) with a variable average number of molecules. In (a), the cycle splits into steps of inoculation, maturation and then pooling, while in (b) it contains in addition a dilution step. The green and red circles represent the replicators and their parasites respectively.

### 60 2.1. Transient compartmentalization with a fixed inoculum size

61 In this subsection, we describe the behavior of a compartmentalized self-replicating system made  
62 of two species: self-replicating molecules (replicases) and parasites. Replicases can make copies of  
63 themselves and of other parasite molecules, while the parasites can only be copied by the replicases.  
64 This is a different case from that discussed in [9], where both the molecules of interests (in that case, the  
65 ribozymes) and the parasites could be replicated by externally provided enzymes. In further contrast,

66 in the present case there is no externally applied selection. Thus the main steps of the replicating cycle  
67 in this case are as shown in Figure 1a :

- 68 • Inoculation of the compartments;
- 69 • Maturation of the compartments;
- 70 • Pooling of compartment contents.

In the inoculation step, as in Ref. [9], one chooses a number  $n$  of molecules from the pool, where  $n$  is Poisson distributed with average  $\lambda$ . The resulting inoculum then contains  $m$  replicases and  $y = n - m$  parasites, which are distributed according to a Binomial distribution of parameter  $x$ , where  $x$  is the initial fraction of replicases in the pool. We shall denote by  $P_\lambda(n, m, x)$  the resulting probability distribution. This follows closely the corresponding steps in Ref. [9]. However, the dynamics of the maturation step is different and is described by the following equations:

$$\begin{aligned} \dot{m}(t) &= \alpha m(t)^2, \\ \dot{y}(t) &= \gamma m(t) y(t), \end{aligned} \quad (1)$$

where  $m(t)$  and  $y(t)$  are respectively the self-replicating and the parasitic species populations at time  $t$ , while  $\alpha$  and  $\gamma$  are their respective replication rates. The analytical solution described in Appendix A yields the compartment composition  $(m(T), y(T))$  at the stopping time  $T$  as a function of the initial composition, denoted by  $(m = m(0), y = y(0))$ . The stopping time  $T$  is itself fixed by the condition

$$m(T) + y(T) = K + n, \quad (2)$$

71 where  $n = m + y$  denotes the initial number of molecules in the compartment and  $K$  is a parameter  
72 that represents the number of new strands that can be created during the replication process, due  
73 to the finite amount of nutrients present in the compartment. We shall call it the carrying capacity.  
74 We shall use in the following the shorthands  $\bar{m} = m(T)$  and  $\bar{n} = m(T) + y(T)$ . Moreover, the ratio  
75  $\Lambda = \gamma/\alpha$  of the replicating constants of both species is another important parameter of the dynamics.

After the maturation step, the contents of the compartments are pooled. The fraction  $x'$  of replicases in the pool is expressed in terms of its value  $x$  at the beginning of the round by the following equation:

$$x'(x, \lambda) = \frac{\langle \bar{m} \rangle}{\langle \bar{n} \rangle} = \frac{\sum_{n,m} \bar{m}(n, m) P_\lambda(n, m, x)}{\sum_{n,m} \bar{n}(n, m) P_\lambda(n, m, x)}, \quad (3)$$

76 where  $\langle \dots \rangle$  denotes the average with respect to the probability distribution  $P_\lambda(n, m, x)$ . Note that  
77 the number of molecules in the compartments at the end of the maturation step is not uniform (in  
78 particular, compartments which are pure in parasites contain at the end the same number of molecules  
79 as in the beginning). Thus we cannot directly average  $x$  over the compartments as it was done in  
80 Ref. [9].

In Appendix B we show that, in the limit  $\Lambda \gg 1$  where the parasites are much more aggressive than the self-replicating molecules, the recursion equation (3) can be simplified, yielding

$$x'(\lambda, x) = \frac{\lambda x + K e^{-\lambda} (e^{\lambda x} - 1)}{\lambda + K(1 - e^{-\lambda x})}. \quad (4)$$

81 The behavior of this model is described in Section 3.1.

## 82 2.2. Transient compartmentalization with variable inoculum size

We now consider a model of transient compartmentalization with a variable inoculum size  $\lambda$ . In experiments based on serial transfers, a fraction of the solution is transferred into a new fresh medium repeatedly [17]. This can be described theoretically by adding a dilution step in the replicating cycle as shown in Figure 1b. Then  $\lambda$  can change because a given amount of the pooling solution can contain a

variable number of replicating molecules, depending on their average concentration. The dynamics is now described by a pair of equations for the evolution of the fraction  $x$  and of the parameter  $\lambda$  :

$$x' = \frac{\langle \bar{m} \rangle}{\langle \bar{n} \rangle}, \quad \lambda' = \frac{\langle \bar{n} \rangle}{d}. \quad (5)$$

83 where  $d$  is the dilution factor and  $\bar{m}$ ,  $\bar{n}$  are given by the same equations as above, evaluated with the  
84 current value of  $\lambda$ .

Using the same approximations used to derive Eq. (4), we obtain the following set of equations, valid for  $\Lambda \gg 1$ :

$$\begin{aligned} x'(\lambda, x) &= \frac{\lambda x + K e^{-\lambda} (e^{\lambda x} - 1)}{\lambda + K(1 - e^{-\lambda x})}, \\ \lambda'(\lambda, x) &= \frac{\lambda + K(1 - e^{-\lambda x})}{d}. \end{aligned} \quad (6)$$

85 These equations can be more easily manipulated than the corresponding equations for the global  
86 compartmentalization process.

87 The behavior of this model is described in Section 3.2.

### 88 3. Results

89 We first describe the results of the model with fixed inoculum size (Figure 1a, Section 2.1), and  
90 then those of the variable inoculum-size model (Figure 1b, Section 2.2).

#### 91 3.1. Fixed inoculum size

92 By studying the stability of the fixed points of the recursion of Eq. (4), we obtain the phase  
93 diagram shown in Figure 2, which represent the compositions that are accessible to the system on  
94 long times. In contrast to the phase diagram obtained in Ref. [9], we find a large region of coexistence  
95 between the self-replicating molecules and the parasites and no pure parasite phase. The absence of  
96 the pure parasite phase is expected, since parasites can not grow without replicators. Thus, there are  
97 only two phases: a pure replicator phase and a coexistence phase, in which compartments remain  
98 of mixed composition. Although the coexistence region appears large, in fact, in the main part of it,  
99 self-replicating molecules are maintained at a very small concentration, as shown by the color scale  
100 in Figure 2. Therefore, to maintain replicators at a significant concentration, one can not escape the  
101 condition that the average size of compartments be of the order of one molecule per compartment.

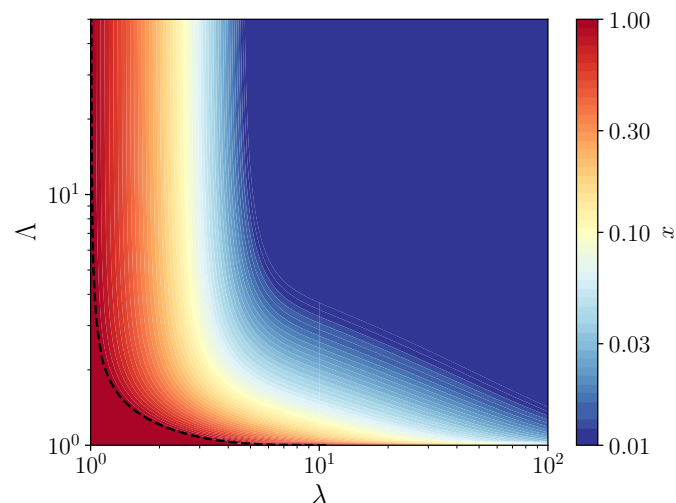

**Figure 2.** Contour map of the fraction  $x$  of replicators as a function of  $(\lambda, \Lambda)$ , for a carrying capacity  $K = 100$ , where  $\lambda$  denotes the average number of molecules per compartment and  $\Lambda$  the relative growth rates of the parasites with respect to the host. The dotted line is the contour of  $x = 1$ , which marks the border of the pure replicators phase (the red region). Above this line, a coexistence region exists between the two species at a fraction of replicators indicated by the color scale.

102 By evaluating the derivative of  $x'$  with respect to  $x$  at  $x = 1$ , one obtains the equation of the vertical  
103 asymptote of the phase diagram separating the pure replicator phase and the coexistence region, which  
104 is given by  $\lambda = 1$ . The same condition used at  $x = 0$  shows that this fixed point is always unstable  
105 at finite value of  $\lambda$ , which confirms that there is no pure parasite phase. In the coexistence region, a  
106 family of vertical asymptotes can be obtained by solving the equation  $x'(\lambda, x) = x$  for  $0 < x < 1$  in  
107 terms of  $\lambda$ . No simple expression has been found for the equations of the corresponding horizontal  
108 asymptotes, which separate the pure replicator phase and the coexistence region when  $\lambda \rightarrow \infty$ .

### 109 3.2. Variable inoculum size

110 The most striking feature of the model with variable inoculum size, described by equations (5), is  
111 the appearance of oscillations in both  $x$  and  $\lambda$ . They are similar to the ones observed in experiments  
112 with host-parasite RNAs [15] and modelled numerically in Ref. [16].

113 When the value of  $K$  and of  $d$  are not too large, this system exhibits oscillations in the populations  
114 of replicators and parasites shown in Figure 3a. These oscillations can also be seen when representing  
115 the fraction  $x$  of replicators as function of the average compartment size  $\lambda$ , as shown in Figure 3b.  
116 This behavior can be explained as follows: after the first inoculation, parasites are being replicated  
117 quickly by replicators, and the dilution does not counterbalance this increase in population. At some  
118 point, the fraction of parasites in the population is so high, that there are not enough self-replicators  
119 to contribute to their replication. Then, the dilution has an important effect, since it decreases the  
120 population per compartment  $\lambda$ , until its average reaches values around  $\lambda = 1$  (see Figure 3b). At  
121 this point, compartments contain on average only a single molecule, which can be either a parasite  
122 or a self-replicator. The population in empty compartments or compartments containing a single  
123 parasite molecule does not grow, therefore only compartments containing a single replicator or  
124 containing one replicator and one parasite will contribute substantially to the next round. At this point  
125 the replicator population increases, and starts replicating parasites for several rounds, triggering the  
126 process again. Note that the mechanism producing these oscillations is different from the Lotka-Volterra  
127 one, where the competition between the two species is the main ingredient [18], instead here transient  
128 compartmentalization plays an essential role.

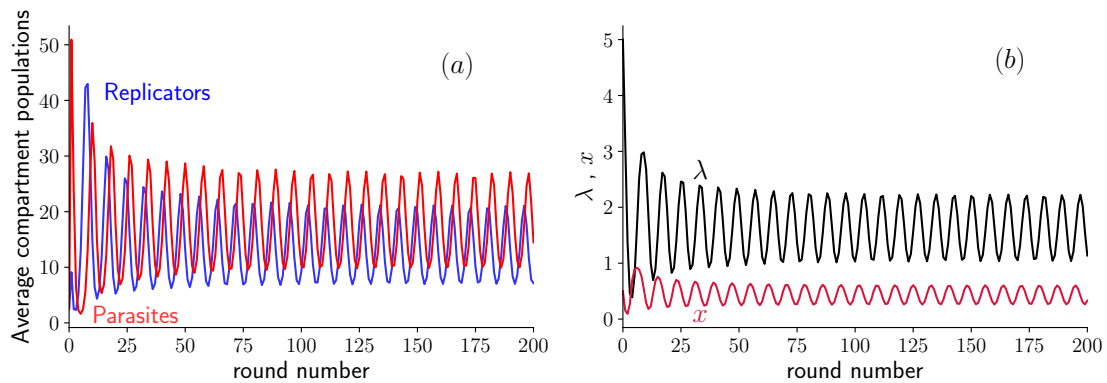

**Figure 3.** Oscillations in the average amount of self-replicating and parasite molecules per compartment as a function of the round number for  $d = 19$ ,  $K = 60$ , and  $\Lambda = 5$ . (a): Average population size  $\langle \bar{m} \rangle$  of replicators and  $\langle \bar{n} - \bar{m} \rangle$  of parasites after the growth step plotted vs. round number. (b): Fraction  $x$  of replicators and average  $\lambda$  of inoculum size. Notice that the oscillations rebound close to the line  $\lambda = 1$ .

129 To delve deeper in the analysis of these oscillations, let us proceed with the equations (6), which  
 130 are valid in the limit  $\Lambda \gg 1$ . In a simulation of these equations at a given value of  $K$ , we observe  
 131 an abrupt transition when varying the dilution factor. Indeed, when  $K = 60$  and  $d = 18$ , the two  
 132 average populations oscillate steadily as shown in Figure 4a, while when  $d = 22$ , oscillations quickly  
 133 die out as shown in Figure 4b. This abrupt transition is the sign of a bifurcation, which we identify as a  
 134 supercritical Hopf bifurcation (see Appendix C for more details). The bifurcation occurs at  $d = 20.74$   
 135 given that  $K = 60$ . Below this value, the system shows unstable spirals and converges to a limit cycle,  
 136 while above this value, the system shows stable spirals which converge towards a fixed point (cf. [19,  
 137 Sec. 8.2]).

138 When the parameter  $d$  is further increased still keeping  $K$  fixed, we find a second transition at  
 139  $d = 37.15$ . At this point, the system no longer oscillates or spirals around a fixed point, but instead  
 140 converges towards this fixed point monotonically, a case identified as stable node in the literature [19,  
 141 p. 128].

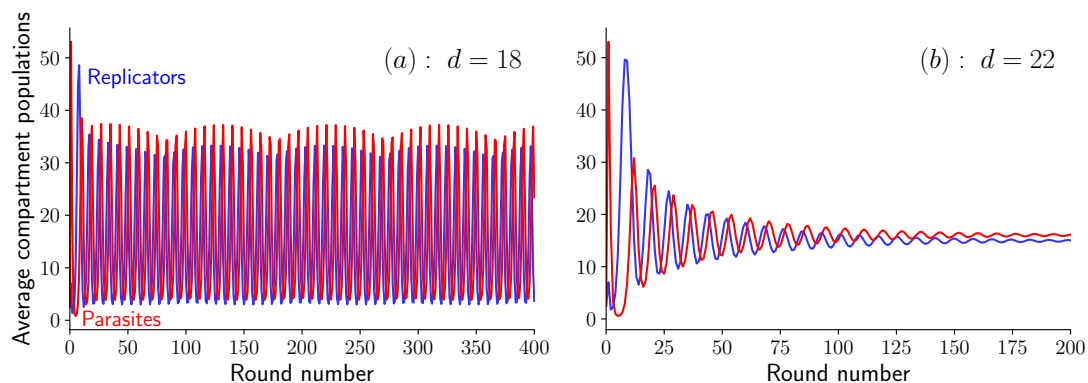

**Figure 4.** Oscillations in the average amount of self-replicating and parasites molecules per compartment as a function of the round number for  $K = 60$  and  $\Lambda \gg 1$ . (a): Steady oscillations at  $d = 18$  (unstable spirals), and (b) damped oscillations at  $d = 22$  (stable spirals). Note the beating pattern in the oscillations visible in (a).

142 Another interesting feature in these oscillations is the beating pattern which is visible on Figure 4a  
 143 as a modulation in the amplitude of the oscillations. This pattern results from the interplay between  
 144 two frequencies, the sampling frequency fixed by the duration of a single round, and the intrinsic  
 145 frequency of the oscillations. By changing the sampling frequency, the beating pattern is accordingly  
 146 modified.

To summarize all these results, we build the phase diagram in the plane  $(K, d)$  shown in Fig. 5a. As can be seen in this figure, the boundaries between the phases, unstable spirals, stable spirals and stable nodes are lines in the plane  $(K, d)$ . This can be understood from the following argument. In the limit  $K \rightarrow \infty$ , the equations which determine the fixed point coordinates  $(x^*, \lambda^*)$  deduced from Eqs. 6 can be simplified to yield :

$$\begin{aligned} x^* &= \frac{e^{-\lambda^*}(e^{\lambda^* x^*} - 1)}{1 - e^{-\lambda^* x^*}}, \\ \lambda^* &= \frac{K(1 - e^{-\lambda^* x^*})}{d}. \end{aligned} \quad (7)$$

The second equation above can be written as

$$\frac{K}{d} = \frac{\lambda^*}{1 - e^{-\lambda^* x^*}}, \quad (8)$$

147 which shows that the coordinates of the fixed point  $(x^*, \lambda^*)$  only depend on the ratio  $K/d$  in the large  $K$   
 148 limit. It follows that the boundary between the region of unstable and stable spirals, where the Hopf  
 149 bifurcation occurs is a straight line as shown in Fig. 5a. A similar argument holds for the boundary  
 150 between the stable spirals and the stable node, which is also a straight line in this diagram.

151 To confirm this interpretation, we show in Fig. 5b, the values of  $(x^*, \lambda^*)$  as a function of  $K$ ,  
 152 evaluated either on the boundary of the Hopf bifurcation and denoted with the subscript 'hopf', or  
 153 on the stable node-stable spirals boundary and denoted with the subscript 'osc'. When reporting the  
 154 asymptotic values of  $(x^*, \lambda^*)$  obtained for large  $K$  into Eq. (8), one recovers the values of the slopes of  
 155 two lines in Fig. 5a. In the end, this analysis of the phase diagram in the plane  $(K, d)$  agrees with the  
 156 general observation made in Ref. [16] that oscillations should be present only in an intermediate range  
 157 of parameters as far as  $K$  and  $d$  are concerned. When either  $K$  or  $d$  is very large, one does not expect  
 158 any oscillations as shown in Fig. 5a.

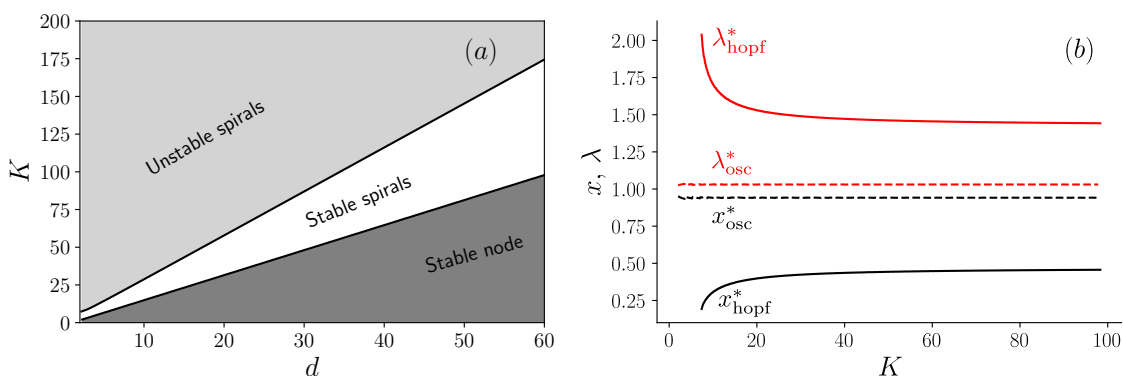

**Figure 5.** (a) Phase diagram in the plane  $(K, d)$  in the limit  $\Lambda \gg 1$  and (b) Evolution of the fixed point coordinates  $(x^*, \lambda^*)$  as a function of  $K$ , on the Hopf bifurcation (solid line) and on the transition line between the stable node and stable spirals (dashed line).

#### 159 4. Discussion

160 We have studied a simple system composed of a self-replicating molecule (a replicase) and a  
 161 parasite molecule that needs the replicase for copying itself. In the case of a fixed inoculum size  
 162 (i.e., for a fixed value of the parameter  $\lambda$ ), we have found that this system is able to maintain the  
 163 replicase molecules against the take-over of parasites in the absence of artificial selection. Although  
 164 the phase diagram contains a large coexistence region, only in a small part of it, when  $\lambda$  is close to  
 165 one, are the replicase molecules maintained at a significant concentration. This may explain why  
 166 experiments on directed evolution using compartmentalized self-replicating molecules such as DNA

167 or RNA are usually carried out in this regime for these molecules, while all other required chemical  
168 species (nucleotides, other intermediates, ...) are typically in excess.

169 The theoretical framework we have developed here for the case of a variable inoculum size has  
170 many similarities with the model proposed in Ref. [16] to explain experiments on host-parasite RNAs  
171 [15]. There are however some differences : we consider an infinite number of compartments instead  
172 of a finite one, we do not include mutations which could turn the replicase into a parasite, and we  
173 do not include local mixing, which means that our model corresponds to the infinite mixing limit of  
174 Ref. [16]. Despite these differences, we also find a regime of values of the parameters (in particular for  
175 the dilution factor or the carrying capacity) in which sustained oscillations are possible in agreement  
176 with Ref. [16]. In Ref. [15], the ratio of catalysis rate constants of the parasite with respect to host,  
177 which we denote  $\Lambda$ , was about 5 : this can be obtained by extracting from Table I from that reference,  
178 values of  $\alpha = 0.29$ ,  $\gamma = 1.5$  and using  $\Lambda = \gamma/\alpha \simeq 5$  [20]. We find that oscillations are indeed present in  
179 our model in this range of the parameters, and oscillation periods comparable to the value reported in  
180 Ref. [15] can be recovered from this estimate.

181 It is interesting to note that both for fixed and variable inoculum sizes, the regime of pure  
182 compartments (one molecule per compartment on average) has a particular significance: for a fixed  
183 inoculum size, only in this regime can a significant average fraction of self-replicating molecules be  
184 maintained, and for a variable inoculum size, only in this regime a rebound can occur in the populations  
185 of molecules, allowing oscillations. We surmise that this regime could have a specific significance for  
186 the Origins of life. To elaborate a bit on this point, we recall that the emergence of special molecules  
187 bearing the genetic information is an essential step in the Origin of Life as emphasized in the RNA  
188 world. These molecules are typically found in minority with respect to other species, yet this minority  
189 has control of the entire cell [21]. This is a form of information control, which is thought to be one of the  
190 key parameters in the Origins of Life [22]. Fluctuations of this minority species therefore have a special  
191 role due to their small number. In contrast, many other chemical species, which are not information  
192 carriers, are found in large numbers, with fluctuations statistically obeying the law of large numbers.  
193 In our model, we see a clear illustration of this mechanism: the replicase behaves as a genome-like  
194 molecule, present at the lowest non-zero possible concentration of one molecule per compartment,  
195 while all other molecules, which depend on the genome molecules for their own making, are available  
196 in the protocell in large concentration.

## 197 5. Conclusions

198 Without considering complex chemistry, we have proposed a model which is able to capture  
199 important features for Origins of life research, such as the ability to maintain self-replicating molecules  
200 using transient compartmentalization and natural selection. An interesting feature of the model with  
201 constant inoculum size, is the maintenance of the self-replicating molecule by a form of information  
202 control, at the critical level of one molecule per compartment. A striking feature of the model with  
203 variable inoculum size, is the appearance of oscillations, which are similar to the ones observed in  
204 experiments with compartmentalized self-replicating RNAs [15].

205 Naturally Ref. [15] has much more than the mere observation of these oscillations. By studying the  
206 sequence information of the replicase and its parasites, the authors of that work suggest that parasites  
207 can take an active part in the evolution of their host and not just in their own. Different sub-populations  
208 of parasites can appear, forming an ecosystem [23] which accelerates evolution. Future studies are  
209 needed to quantify these co-evolutionary mechanisms, and perhaps our model could help in that task.

210 Another important direction for future work would be to consider a large number of interacting  
211 chemical species, a situation frequently encountered in Statistical Physics [24]. In this case, we expect  
212 that the basic unit of description may no longer be that of single chemical species, but could become  
213 collective excitations of the composition, similar to quasi-species [25] or composomes [26]. A general  
214 theory of non-equilibrium chemical networks, constrained by conservation laws and symmetries has  
215 been recently put forward [27,28]. One attractive feature of such a framework for describing complex



216 chemical systems is that it relies mainly on stoichiometry, therefore the explicit knowledge of the  
217 kinetics, which is often missing, is not needed [17].

218 New types of emergent behaviors could arise by enlarging further the dynamics of  
219 compartmentalization. One possibility would be to consider loose compartments [29] or a continuous  
220 automated *in vitro* evolution [30]. Besides the relevance for the Origins of Life, we hope that our  
221 work could trigger new research directions on applications of transient compartmentalization for  
222 chemistry or biochemistry. Perhaps, these new research directions could help overcome practical and  
223 fundamental hurdles associated with the synthesis of complex molecules, and facilitate the making of  
224 new catalysts or artificial cells [31].

225 **Author Contributions:** Conceptualization, L.P. and D.L.; methodology, G.L.; software, G.L., L. P.; validation, G.L.,  
226 D.L. and L.P.; formal analysis, G.L.; investigation, G.L.; resources, D.L.; data curation, G.L.; writing–original  
227 draft preparation, D.L.; writing–review and editing, L.P. and G.L.; visualization, G.L.; supervision, D.L.; project  
228 administration, D.L.; funding acquisition, D.L.

229 **Funding:** L.P. was supported by the Agence Nationale de la Recherche (No. ANR-10-IDEX- 0001-02, IRIS OCAV).  
230 We also acknowledge funding from Labex CeTisPhysBio (ANR-10-LBX- 0038) and Institut de Convergences Qlife:  
231 17-CONV-0005 Q-LIFE.

232 **Acknowledgments:** LP is grateful to the Gulliver lab of the ESPCI for a most pleasant hospitality. We would like  
233 to thank T. Furubayashi for many insightful discussions and a critical reading of this work. D. L. would like to  
234 thank A. Blokhuis for a particularly fruitful collaboration on which this work is built.

235 **Conflicts of Interest:** The authors declare no conflict of interest. The funders had no role in the design of the  
236 study; in the collection, analyses, or interpretation of data; in the writing of the manuscript, or in the decision to  
237 publish the results.

## 238 Appendix A. Exact solution of the maturation equations

The maturation equations (1) can be solved analytically to give

$$\begin{aligned} m(t) &= \frac{m}{1 - \alpha t m}, \\ y(t) &= \frac{y}{(1 - \alpha t m)^\Lambda}, \end{aligned} \quad (\text{A1})$$

where  $m$  and  $y$  are the initial population sizes of both species,  $n$  their sum,  $t$  the time, and  $\Lambda = \gamma/\alpha$  the ratio of the two replicating constants. The dynamics of these equations is hyper-exponential, and exhibits finite-time divergencies. However, the divergencies are not relevant for the model, since the carrying capacity cutoff stops this dynamics at finite values of  $m$  and  $y$ , as intimated by the stopping condition given by Eq. (2). Introducing the quantity  $u = 1 - \alpha t m$ , we express the stopping condition (2) as follows:

$$\frac{m}{u} + \frac{(n - m)}{u^\Lambda} = K + n. \quad (\text{A2})$$

239 We can then solve this equation in terms of  $u$  to obtain the final population sizes denoted by  $\bar{m}$  and  $\bar{n}$ .

## 240 Appendix B. Derivation of the equations in the $\Lambda \gg 1$ limit

The expression of  $x'$  in the  $\Lambda \gg 1$  limit is evaluated by splitting averages in multiple parts. The denominator  $\langle \bar{n} \rangle$  of the recursion (3) is given by

$$\sum_{n,m} \bar{n} P_\lambda(n, m, x) = \sum_n \bar{n} P_\lambda(n, 0, x) + \sum_{n>0, m>0} \bar{n} P_\lambda(n, m, x), \quad (\text{A3})$$

where the first sum of the right hand side corresponds to compartments without self-replicators ( $m = 0$ ) and the second one corresponds to all other compartments containing replicases. Their final populations remain equal to  $n$  molecules after the maturation in the former compartments without

replicators and grow to  $K + n$  molecules in compartment containing replicases. Thus,  $\langle \bar{n} \rangle$  can be expressed by

$$\langle \bar{n} \rangle = \sum_n n P_\lambda(n, 0, x) + \sum_{n>0, m>0} (K + n) P_\lambda(n, m, x), \quad (\text{A4})$$

and, using the definition of  $P_\lambda(n, m, x)$  introduced in section 2.1, yields the exact equation

$$\langle \bar{n} \rangle = \lambda + K(1 - e^{-\lambda x}). \quad (\text{A5})$$

The numerator  $\langle \bar{m} \rangle$  is evaluated in a similar way, starting by splitting the average to give

$$\sum_{n,m} \bar{m} P_\lambda(n, m, x) = \sum_{n>0} \bar{m} P_\lambda(n, n, x) + \sum_{n>0, 0<m<n} \bar{m} P_\lambda(n, m, x), \quad (\text{A6})$$

where the first sum of the right hand side corresponds to compartments with only self-replicating molecules ( $m = n$ ), and the second sum corresponds to compartments with mixed populations. Empty and pure parasitic compartments do not contribute to the average because in them  $\bar{m} = 0$ . In the former case the final self-replicator population verifies  $\bar{m} = K + n$ . In the latter case, with mixed population, no exact solution for  $\bar{m}$  can be determined. We assume that self-replicators do not have the time to replicate during the maturation in presence of aggressive parasites, i.e., that  $\bar{m} = m$  if  $\Lambda \gg 1$ . Equation (A6) can thus be rewritten

$$\langle \bar{m} \rangle = \sum_{n>0} (K + n) P_\lambda(n, n, x) + \sum_{n>0, 0<m<n} m P_\lambda(n, m, x), \quad (\text{A7})$$

and gives after similar derivations as for equation (A5),

$$\langle \bar{m} \rangle = K e^{-\lambda} (e^{\lambda x} - 1) + \lambda x, \quad (\text{A8})$$

as long as  $\Lambda \gg 1$ . Finally, by combining equations (A5) and (A8), one obtains the following approximate expression, valid for  $\Lambda \gg 1$ , of the recursion equation (3):

$$x'(\lambda, x) = \frac{\lambda x + K e^{-\lambda} (e^{\lambda x} - 1)}{\lambda + K(1 - e^{-\lambda x})}. \quad (\text{A9})$$

241 The approximate expression of Eqs. (5) straightforwardly follows.

## 242 Appendix C. Analysis of the bifurcation

243 In order to analyze the nature of the bifurcation, one could a priori use either the coordinates  $(\langle \bar{m} \rangle,$   
 244  $\langle \bar{y} \rangle)$  or the coordinates  $(x, \lambda)$ , since there exists a simple bijection between the two sets of coordinates  
 245 defined by Eq. (5). In the following, we have studied numerically the Jacobian of the system of  
 246 equations in the coordinates  $(x, \lambda)$  given by Eqs. (6). We denote the two eigenvalues of this Jacobian  
 247 by  $\phi_k$  with  $k = 1, 2$ . The behavior of these quantities is shown in Figure A1. By evaluating the two  
 248 eigenvalues at the fixed point  $(x^*, \lambda^*)$ , we observe that their modulus moves from above to below 1 as  
 249  $d$  changes from  $d < 20.74$  to  $d > 20.74$ . This means that the fixed point  $(x^*, \lambda^*)$  with  $0 < x^* < 1$ , which  
 250 is unstable for  $d < 20.74$ , becomes stable as  $d$  increases beyond this value. At the transition point for  
 251  $d = 20.74$ , the eigenvalues are complex, which is the indication of a Hopf bifurcation. Below  $d < 20.74$ ,  
 252 the system spirals up from the unstable fixed point to a stable limit cycle, which encloses the fixed  
 253 point, while for  $d > 20.74$ , the system spirals down towards the stable fixed point. We checked that  
 254 the amplitude of the oscillations decreases smoothly to zero as the bifurcation point is approached,  
 255 and that therefore the bifurcation is supercritical. There is a second transition at  $d = 37.15$ , where the  
 256 imaginary parts of the eigenvalues vanish. This means that the system no longer oscillates or spirals  
 257 around the fixed point, but instead converges to it monotonically. In this regime, the fixed point is  
 258 therefore a stable node [19, p. 128].

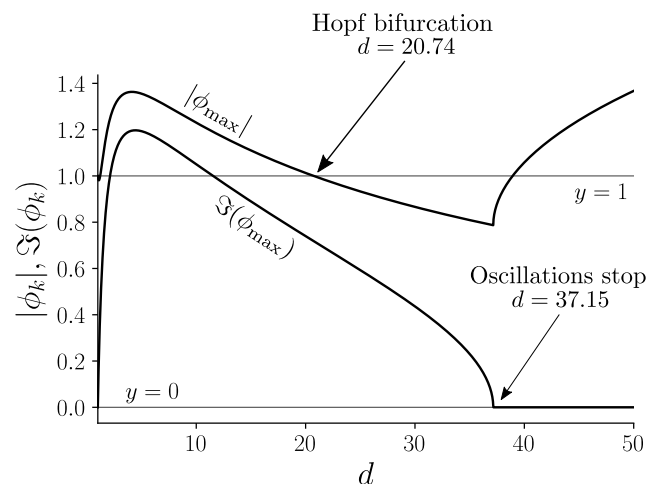

**Figure A1.** Maximal modulus and maximal imaginary part of eigenvalues of the Jacobian corresponding to Eqs. (6) for a carrying capacity  $K = 60$ .

## References

- 259 1. Dyson, F. *Origins of life*; Cambridge University Press, 1985.
- 260 2. Spiegelman, S.; Haruna, I.; Holland, I.B.; Beaudreau, G.; Mills, D. The synthesis of a self-propagating  
261 infectious nucleic acid with a purified enzyme. *Proc. Natl. Acad. Sci. USA* **1965**, *54*, 919–927.  
262 doi:10.1073/pnas.54.3.919.
- 263 3. Eigen, M. Self-organization of matter and the evolution of biological macromolecules. *Naturwissenschaften*  
264 **1971**, *58*, 465–523.
- 265 4. Tupper, A.S.; Higgs, P.G. Error thresholds for RNA replication in the presence of both point mutations and  
266 premature termination errors. *J. Theor. Biol.* **2017**, *428*, 34–42.
- 267 5. Grey, D.; Hutson, V.; Szathmáry, E. A re-examination of the stochastic corrector model. *Proc. R. Soc. Lond.*  
268 *B* **1995**, *262*, 29–35.
- 269 6. Szathmáry, E.; Demeter, L. Group selection of early replicators and the origin of life. *J. Theor. Biol* **1987**,  
270 *128*, 463–86.
- 271 7. Matsumura, S.; Kun, A.; Rycckelynck, M.; Coldren, F.; Szilágyi, A.; Jossinet, F.; Rick, C.; Nghe, P.; Szathmáry,  
272 E.; Griffiths, A.D. Transient compartmentalization of RNA replicators prevents extinction due to parasites.  
273 *Science* **2016**, *354*, 1293–1296. doi:10.1126/science.aag1582.
- 274 8. Blokhuis, A.; Nghe, P.; Peliti, L.; Lacoste, D. The generality of transient compartmentalization and its  
275 associated error thresholds. *BioRxiv* **2019**.
- 276 9. Blokhuis, A.; Lacoste, D.; Nghe, P.; Peliti, L. Selection dynamics in transient compartmentalization. *Phys.*  
277 *Rev. Lett.* **2018**, *120*, 158101.
- 278 10. Tkachenko, A.V.; Maslov, S. Spontaneous emergence of autocatalytic information-coding polymers. *J.*  
279 *Chem. Phys.* **2015**, *143*, 045102.
- 280 11. Geyrhofer, L.; Brenner, N. Coexistence and cooperation in structured habitats. *bioRxiv* **2018**.
- 281 12. Baaske, P.; Weinert, F.M.; Duhr, S.; Lemke, K.H.; Russell, M.J.; Braun, D. Extreme accumulation of  
282 nucleotides in simulated hydrothermal pore systems. *Proc. Natl. Acad. Sci. U.S.A.* **2007**, *104*, 9346–9351.  
283 doi:10.1073/pnas.0609592104.
- 284 13. Zadorin, A.S.; Rondelez, Y. Selection strategies for randomly partitioned genetic replicators. *Phys. Rev. E*  
285 **2019**, *99*, 062416. doi:10.1103/PhysRevE.99.062416.
- 286 14. Takeuchi, N.; Hogeweg, P. Evolutionary dynamics of RNA-like replicator systems: A bioinformatic  
287 approach to the origin of life. *Phys. of Life Rev.* **2012**, *9*, 219 – 263.
- 288 15. Bansho, Y.; Furubayashi, T.; Ichihashi, N.; Yomo, T. Host–parasite oscillation dynamics and evolution in a  
289 compartmentalized RNA replication system. *Proc. Natl. Acad. Sci. USA* **2016**, *113*, 4045–4050.
- 290 16. Furubayashi, T.; Ichihashi, N. Sustainability of a compartmentalized host-parasite replicator system under  
291 periodic washout-mixing cycles. *Life* **2018**, *8*, 10.
- 292

- 293 17. Blokhuis, A.; Lacoste, D.; Gaspard, P. Reaction Kinetics in open reactors and serial transfers between closed  
294 reactors. *J. Chem. Phys.* **2018**, *148*, 144902.
- 295 18. Fujii, T.; Rondelez, Y. Prey Molecular Ecosystems. *ACS Nano* **2013**, *7*, 27–34. PMID: 23176248.
- 296 19. Strogatz, S.H. *Nonlinear Dynamics and Chaos*; Perseus Books Publishing, 1994.
- 297 20. Private communication with T. Furubayashi.
- 298 21. Kaneko, K.; Yomo, T. On a kinetic origin of heredity: minority control in a replicating system with mutually  
299 catalytic molecules. *J. Theor. Biol.* **2002**, *214*, 563–576.
- 300 22. Nghe, P.; Hordijk, W.; Kauffman, S.A.; Walker, S.I.; Schmidt, F.J.; Kemble, H.; Yeates, J.A.; Lehman, N.  
301 Prebiotic network evolution: six key parameters. *Mol Biosyst* **2015**, *11*, 3206–3217.
- 302 23. Furubayashi, T.; Ueda, K.; Bansho, Y.; Motooka, D.; Nakamura, S.; Ichihashi, N. Evolutionary arms-races  
303 between host and parasitic RNA replicators in an artificial cell-like system. *bioRxiv* **2019**, p. 728659.
- 304 24. Goldenfeld, N.; Woese, C. Life is physics: evolution as a collective phenomenon far from equilibrium.  
305 *Annu. Rev. Condens. Matter Phys.* **2011**, *2*, 375–399.
- 306 25. Eigen, M.; Schuster, P. The Hypercycle. *Naturwissenschaften* **1978**, *65*, 7–41.
- 307 26. Lancet, D.; Zidovetzki, R.; Markovitch, O. Systems protobiology: origin of life in lipid catalytic networks.  
308 *J. Royal Soc. Interface* **2018**, *15*, 20180159.
- 309 27. Rao, R.; Esposito, M. Nonequilibrium thermodynamics of chemical reaction networks: wisdom from  
310 stochastic thermodynamics. *Physical Review X* **2016**, *6*, 041064.
- 311 28. Polettoni, M.; Esposito, M. Irreversible thermodynamics of open chemical networks. I. Emergent cycles  
312 and broken conservation laws. *J. Chem. Phys.* **2014**, *141*, 024117.
- 313 29. Kamimura, A.; Matsubara, Y.J.; Kaneko, K.; Takeuchi, N. Horizontal transfer between loose compartments  
314 stabilizes replication of fragmented ribozymes. *PLoS Comput Biol* **2019**, *15*, e1007094.
- 315 30. Yoshiyama, T.; Ichii, T.; Yomo, T.; Ichihashi, N. Automated in vitro evolution of a translation-coupled RNA  
316 replication system in a droplet flow reactor. *Sci Rep* **2018**, *8*, 11867.
- 317 31. Beneyton, T.; Krafft, D.; Bednarz, C.; Kleineberg, C.; Woelfer, C.; Ivanov, I.; Vidaković-Koch, T.; Sundmacher,  
318 K.; Baret, J.C. Out-of-equilibrium microcompartments for the bottom-up integration of metabolic functions.  
319 *Nat Commun* **2018**, *9*, 2391.

320 © 2019 by the authors. Submitted to *Life* for possible open access publication under the terms and conditions of  
321 the Creative Commons Attribution (CC BY) license (<http://creativecommons.org/licenses/by/4.0/>).
